# Supplementary material for: MicroRNA-145 Regulates Pathological Retinal Angiogenesis by Suppression of TMOD3
Source: PubMed Central journal article supplement — Mol Ther Nucleic Acids. 2019 Mar 21;16:335–47. doi: 10.1016/j.omtn.2019.03.001 (PMC6460252; doi:10.1016/j.omtn.2019.03.001), 2019-03-21
Supplement: mmc1.pdf [file mmc1.pdf]

OMTN, Volume 16

## Supplemental Information

### ***MicroRNA-145* Regulates Pathological Retinal Angiogenesis by Suppression of TMOD3**

Chi-Hsiu Liu, Zhongxiao Wang, Shuo Huang, Ye Sun, and Jing Chen

# Supplemental Information

## *MicroRNA-145* regulates pathological retinal angiogenesis by suppression of *TMOD3*

Chi-Hsiu Liu, Zhongxiao Wang, Shuo Huang, Ye Sun and Jing Chen \*

Department of Ophthalmology, Boston Children's Hospital, Harvard Medical School, Boston, Massachusetts 02115, USA

\*Corresponding author should be addressed to J. C. (jing.chen@childrens.harvard.edu)

**Table S1. Primers for q-PCR**

| Gene          | Forward (5'→3')       | Reverse (5'→3')         |
|---------------|-----------------------|-------------------------|
| <b>Mouse</b>  |                       |                         |
| <i>c-Myc</i>  | GGATTGGGCTACGGAGATGCT | ATGACCGGATTAGGAGTGAAG   |
| <i>Gapdh</i>  | GCCTACATG GCCTCCAAGG  | GAGTTGGGATAGGGCCTCTCTT  |
| <i>Klf4</i>   | GTGCCCCGACTAACCGTTG   | GTCGTTGAACTCCTCGGTCT    |
| <i>Sema3a</i> | TGACGCCCAGCCAGAAGGTCT | AGAGTGCCCCGGCCTTTGTC    |
| <i>Tmem9b</i> | CTATGGTGCGGAAACCTGCT  | GCCCAGGATTCTCTTTATAGGGA |
| <i>Tmod3</i>  | CTCCTTGGCAAGCTGTCCG   | CCCGTGGCAGACTTTGATGT    |
| <i>Trio</i>   | AGTCTGAGCACATTGTGTCCG | GCACGATGCACATGACTTCTA   |
| <i>18S</i>    | TGCTGCAGTAAAAAGCTCGT  | GGCCTGCTTTGAACACTCTAA   |
| <b>Human</b>  |                       |                         |
| <i>TMOD3</i>  | GTGACCTCGCAGCAATTCTTG | GTGGCTCATCAAATACCGGAA   |
| <i>18S</i>    | ACGGAAGGGCACCACCAGGA  | CACCACCACCCACGGAATCG    |

**Table S2. Oligonucleotide sequences for luciferase reporter constructs**

| Gene          | NCBI Ref_Seq Accession Number | Seed Position     | Sequences (5'→3')*                                    |
|---------------|-------------------------------|-------------------|-------------------------------------------------------|
| <i>Klf4</i>   | NM_010637.3                   | +2,399...+2,405   | AAATGCCAAGGGGTG <u>ACTGGA</u> AGTTTGTGGATATCAGGGT     |
| <i>Sema3a</i> | NM_001243072.1                | +2,751...+2,757   | ACTTGCTTAGATAATA <u>AACTGGA</u> AAAAAATGCAATACAC      |
|               |                               | +5,573...+5,579   | AGATGGGAAGTAGAAA <u>AACTGGA</u> GAGAAAAAATGTAACG      |
| <i>Tmem9b</i> | NM_020050.1                   | +691...+697       | CCTCAGCTAACTGGGA <u>ACTGGA</u> ATCAGGTGACTAGGAAG      |
|               |                               | +810...+816       | TGGAGGAAGACTCCAA <u>AACTGGA</u> AGCAAACCCCATGCTTGGTAT |
| <i>Tmod3</i>  | NM_016963.2                   | +1,345...+1,351   | GGTAGAAGGGAAAG <u>ACTGGA</u> AATCTTTTAACTATATG        |
| <i>Trio</i>   | NM_001081302.1                | +10,797...+10,803 | ATACTCTGAATATAAAA <u>AACTGGA</u> AATAGGGTAATGTTTTAA   |
|               |                               | +11,299...+11,305 | GAAATTGGATTCAAAA <u>AACTGGA</u> TGTGTATCTGTAACCTCA    |

\*The *mmu-miR-145* seed sequence-matched sites are underlined.
